# Supplementary material for: Hydration of beryllium(ii) in aqueous solutions of common inorganic salts. A combined vibrational spectroscopic and ab initio molecular orbital study
Source: Royal Society of Chemistry journal article supplement (doi:10.1039/b902481f), 2009-01-01
Supplement: b902481f.pdf [file b902481f.pdf]

Electronic Supplementary Information for Dalton Transactions  
This journal is © The Royal Society of Chemistry 2009

**Supplementary Material to: Hydration of Be<sup>2+</sup> in aqueous solutions of simple inorganic salts.  
A combined vibrational spectroscopic and *ab initio* study.**

Wolfram W. Rudolph<sup>1\*</sup>, Dieter Fischer<sup>2</sup>, Gert Irmer<sup>3</sup>, Cory C. Pye<sup>4</sup>

<sup>1</sup>) Medizinische Fakultät der TU Dresden, Institut für Virologie im MTZ, Fiedlerstr. 42  
D-01307 Dresden, Germany; e-mail: [Wolfram.Rudolph@tu-dresden.de](mailto:Wolfram.Rudolph@tu-dresden.de).

<sup>2</sup>) Institute of Polymer Research Dresden, Hohe Strasse 6, D-01069 Dresden. Germany.

<sup>3</sup>) Technische Universität Bergakademie Freiberg, Institut für Theoretische Physik,  
Leipziger Str. 23, D-09596 Freiberg, Germany.

<sup>4</sup>) Department of Chemistry, St. Mary's University, 923 Robie Street, Halifax, Nova Scotia, B3H  
3C3 Canada.

---

<sup>1</sup> Author for correspondence

**Table S1.** Assignment of tetraaquaberyllium(II) ( $S_4$ )

| sym. | description                                   | MP2/6-31G* | MP2/6-31+G* | B3LYP/6-31G* |
|------|-----------------------------------------------|------------|-------------|--------------|
| A    | BeO <sub>4</sub> deformation + water twisting | 112        | 140         | 134          |
| E    | BeO <sub>4</sub> deformation + water twisting | 136        | 141         | 143          |
| B    | BeO <sub>4</sub> deformation                  | 154        | 157         | 154          |
| A    | water twisting                                | 235        | 246         | 233          |
| B    | BeO <sub>4</sub> deformation                  | 243        | 247         | 251          |
| E    | water twisting + wagging                      | 255        | 262         | 261          |
| B    | water twisting                                | 361        | 373         | 357          |
| E    | water wagging                                 | 370        | 406         | 382          |
| A    | water wagging                                 | 375        | 406         | 388          |
| B    | water wagging                                 | 433        | 457         | 444          |
| A    | BeO <sub>4</sub> stretching                   | 472        | 471         | 473          |
| E    | water rocking + BeO <sub>4</sub> stretching   | 613        | 612         | 604          |
| B    | water rocking + BeO <sub>4</sub> stretching   | 653        | 653         | 643          |
| A    | water rocking                                 | 680        | 683         | 670          |
| E    | BeO <sub>4</sub> stretching + water rocking   | 865        | 857         | 856          |
| B    | BeO <sub>4</sub> stretching + water rocking   | 880        | 872         | 867          |
| B    | water deformation                             | 1728       | 1723        | 1707         |
| E    | water deformation                             | 1730       | 1726        | 1710         |
| A    | water deformation                             | 1739       | 1735        | 1718         |
| E    | water sym stretching                          | 3667       | 3644        | 3659         |
| B    | water sym stretching                          | 3667       | 3644        | 3659         |
| A    | water sym stretching                          | 3685       | 3659        | 3676         |
| A    | water asym stretching                         | 3751       | 3731        | 3729         |
| E    | water asym stretching                         | 3752       | 3732        | 3730         |
| B    | water asym stretching                         | 3754       | 3734        | 3731         |

**Table S2.** Total Energies of beryllium species

| Level                                                                    | HF/STO-3G    | HF/3-21G                | HF/6-31G*                  |
|--------------------------------------------------------------------------|--------------|-------------------------|----------------------------|
| Be <sup>2+</sup>                                                         | -13.4397580  | -13.530279              | -13.6098005                |
| H <sub>2</sub> O C <sub>2v</sub>                                         | -74.9659012  | -75.5859598             | -76.0107465                |
| Be(H <sub>2</sub> O) <sub>1</sub> <sup>2+</sup> C <sub>2v</sub>          | -88.7326468  | -89.3858023             | -89.8546095                |
| Be(H <sub>2</sub> O) <sub>2</sub> <sup>2+</sup> D <sub>2d</sub>          | -163.9838116 | -165.2054592            | -166.0602912               |
| Be(H <sub>2</sub> O) <sub>3</sub> <sup>2+</sup> D <sub>3</sub>           | -239.1495404 | -240.9572131            | -242.2031810               |
| Be(H <sub>2</sub> O) <sub>4</sub> <sup>2+</sup> S <sub>4</sub>           | -314.2503131 | -316.6597913            | -318.2992010               |
| Be(H <sub>2</sub> O) <sub>5</sub> <sup>2+</sup> C <sub>2v</sub>          | -389.2611907 | -392.2899325            | -394.3364232               |
| Be(H <sub>2</sub> O) <sub>5</sub> <sup>2+</sup> C <sub>2</sub>           | -389.2620194 | Went to C <sub>2v</sub> |                            |
| Be(H <sub>2</sub> O) <sub>5</sub> <sup>2+</sup> [4+1] C <sub>s</sub>     |              | -392.3218256            | -394.3606034               |
| Be(H <sub>2</sub> O) <sub>5</sub> <sup>2+</sup> [4+1] C <sub>2</sub>     |              | -392.3220945            | -394.3611470               |
| Be(H <sub>2</sub> O) <sub>6</sub> <sup>2+</sup> T <sub>h</sub>           | -464.2801444 | -467.9204341            | -470.3743458               |
| Be(H <sub>2</sub> O) <sub>6</sub> <sup>2+</sup> [4+2] D <sub>2d</sub>    | -464.3205145 | -467.9795149            | -470.4203408               |
| Be(H <sub>2</sub> O) <sub>6</sub> <sup>2+</sup> [4+2] C <sub>s</sub> #1  | -464.3121473 | -467.9724994            | -470.4141716               |
| Be(H <sub>2</sub> O) <sub>6</sub> <sup>2+</sup> [4+2] C <sub>s</sub> #2  | -464.3132687 | -467.9731659            | -470.4161429               |
| Be(H <sub>2</sub> O) <sub>6</sub> <sup>2+</sup> [4+2] C <sub>1</sub>     |              | -467.9731767            | -470.4162814               |
| Be(H <sub>2</sub> O) <sub>8</sub> <sup>2+</sup> [4+4] S <sub>4</sub>     | -614.3598215 | -619.2519722            | Went to D <sub>2d</sub> #2 |
| Be(H <sub>2</sub> O) <sub>8</sub> <sup>2+</sup> [4+4] D <sub>2d</sub> #1 | -614.3037082 | -619.2141042            | -622.4974267               |
| Be(H <sub>2</sub> O) <sub>8</sub> <sup>2+</sup> [4+4] D <sub>2d</sub> #2 |              |                         | -622.5161435               |
| Be(H <sub>2</sub> O) <sub>12</sub> <sup>2+</sup> [4+8] D <sub>2d</sub>   | -914.3576349 | -921.7551184            | -926.6680404               |
| Be(H <sub>2</sub> O) <sub>12</sub> <sup>2+</sup> [4+8] S <sub>4</sub>    | -914.3582058 | -921.7872005            | -926.6749590               |
| Be(H <sub>2</sub> O) <sub>18</sub> <sup>2+</sup> [6+12] D <sub>2d</sub>  |              | -1375.5002190           | -1382.8437815              |

**Table S2.** Total Energies of beryllium species (continued)

|                                                                          | HF/6-31+G*   | MP2/6-31G*                 | MP2/6-31+G*                |
|--------------------------------------------------------------------------|--------------|----------------------------|----------------------------|
| Be <sup>2+</sup>                                                         | -13.6098066  | As HF                      | As HF                      |
| H <sub>2</sub> O C <sub>2v</sub>                                         | -76.0177432  | -76.1968478                | -76.2097766                |
| Be(H <sub>2</sub> O) <sub>1</sub> <sup>2+</sup> C <sub>2v</sub>          | -89.8555961  | -90.048141                 | -90.0503103                |
| Be(H <sub>2</sub> O) <sub>2</sub> <sup>2+</sup> D <sub>2d</sub>          | -166.0638598 | -166.4468215               | -166.4530896               |
| Be(H <sub>2</sub> O) <sub>3</sub> <sup>2+</sup> D <sub>3</sub>           | -242.2088940 | -242.7824444               | -242.7939481               |
| Be(H <sub>2</sub> O) <sub>4</sub> <sup>2+</sup> S <sub>4</sub>           | -318.3088383 | -319.0715550               | -319.0911333               |
| Be(H <sub>2</sub> O) <sub>5</sub> <sup>2+</sup> C <sub>2v</sub>          | -394.3510210 | -395.3032639               | -395.3331264               |
| Be(H <sub>2</sub> O) <sub>5</sub> <sup>2+</sup> [4+1] C <sub>s</sub>     | -394.3739105 | -395.3276444               | -395.3552591               |
| Be(H <sub>2</sub> O) <sub>5</sub> <sup>2+</sup> [4+1] C <sub>2</sub>     | -394.3742408 | -395.3285773               | -395.3558937               |
| Be(H <sub>2</sub> O) <sub>6</sub> <sup>2+</sup> T <sub>h</sub>           | -470.3946568 | -471.5359538               | -471.5789712               |
| Be(H <sub>2</sub> O) <sub>6</sub> <sup>2+</sup> [4+2] D <sub>2d</sub>    | -470.4377481 | -471.5810503               | -471.6177118               |
| Be(H <sub>2</sub> O) <sub>6</sub> <sup>2+</sup> [4+2] S <sub>4</sub>     |              | -471.5811196               |                            |
| Be(H <sub>2</sub> O) <sub>6</sub> <sup>2+</sup> [4+2] C <sub>s</sub> #1  | -470.4309814 | -471.5748335               | -471.6107089               |
| Be(H <sub>2</sub> O) <sub>6</sub> <sup>2+</sup> [4+2] C <sub>s</sub> #2  | -470.4330342 | -471.5770811               | -471.6130773               |
| Be(H <sub>2</sub> O) <sub>6</sub> <sup>2+</sup> [4+2] C <sub>1</sub>     | -470.4332640 | -471.                      | -471.                      |
| Be(H <sub>2</sub> O) <sub>8</sub> <sup>2+</sup> [4+4] S <sub>4</sub>     | -622.5375901 | Went to D <sub>2d</sub> #2 | Went to D <sub>2d</sub> #2 |
| Be(H <sub>2</sub> O) <sub>8</sub> <sup>2+</sup> [4+4] D <sub>2d</sub> #1 | -622.5227534 | -624.0463051               | -624.1003953               |
| Be(H <sub>2</sub> O) <sub>8</sub> <sup>2+</sup> [4+4] D <sub>2d</sub> #2 | -622.5411888 | -624.0632065               | -624.1176026               |
| Be(H <sub>2</sub> O) <sub>12</sub> <sup>2+</sup> [4+8] D <sub>2d</sub>   | -926.7179770 | -928.9708655               | -929.0763408               |
| Be(H <sub>2</sub> O) <sub>12</sub> <sup>2+</sup> [4+8] S <sub>4</sub>    | -926.7227062 | -928.9855258               | -929.0856764               |
| Be(H <sub>2</sub> O) <sub>18</sub> <sup>2+</sup> [6+12] D <sub>2d</sub>  |              |                            |                            |
